# Supplementary material for: The E3 ubiquitin ligase ARIH1 promotes antiviral immunity and autoimmunity by inducing mono-ISGylation and oligomerization of cGAS
Source: PubMed Central journal article supplement (PMC9551088; doi:10.1038/s41467-022-33671-5), 2022-10-10
Supplement: 41467_2022_33671_MOESM1_ESM.pdf [file 41467_2022_33671_MOESM1_ESM.pdf]

## Supplementary Information

**The E3 ubiquitin ligase ARIH1 promotes antiviral immunity and autoimmunity by inducing mono-ISGylation and oligomerization of cGAS**

Xiong et al

# Supplementary Figure 1

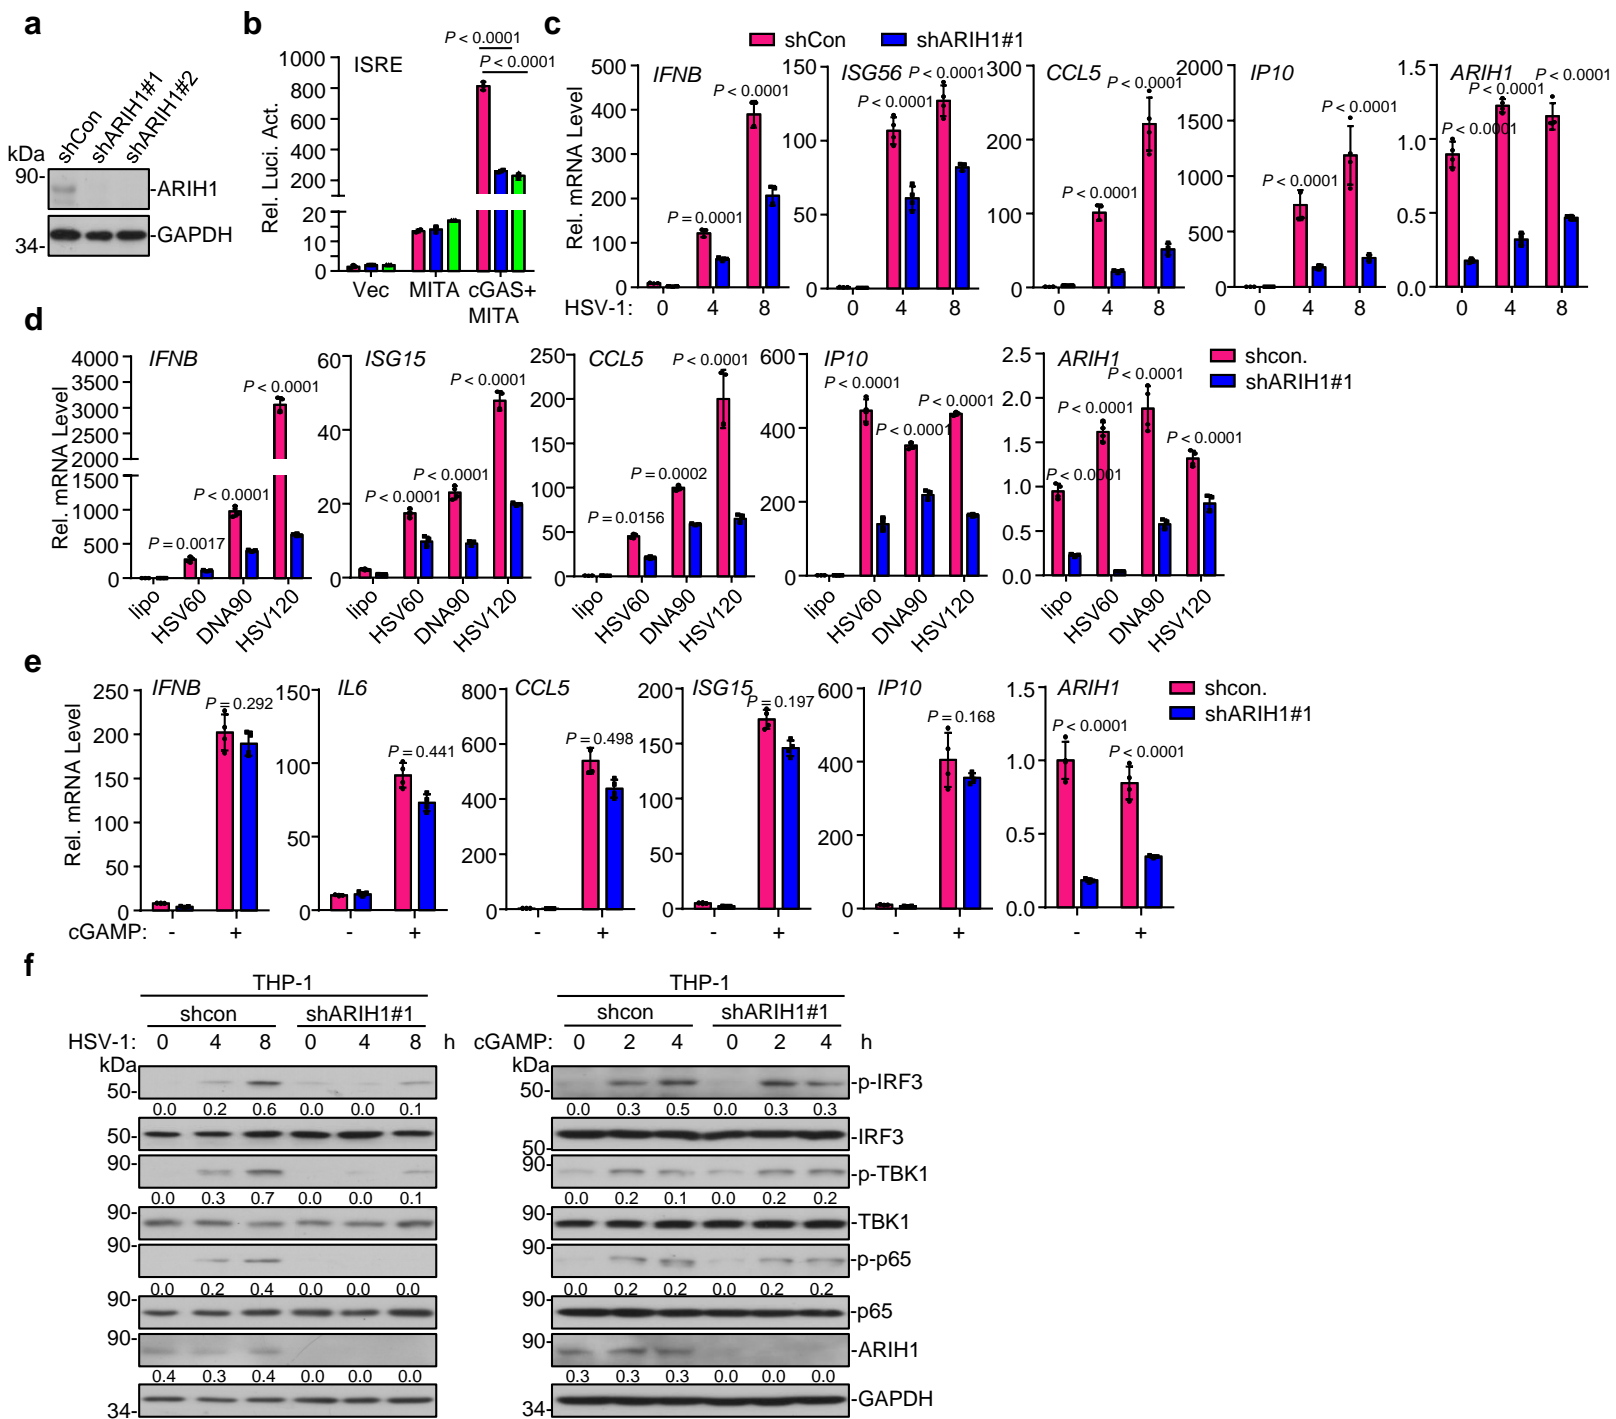

## Supplementary Figure 1 Knockdown of ARIH1 inhibits HSV-1-induced expression of downstream genes.

(a) Immunoblot analysis of ARIH1 and GAPDH in HEK293 cells that were transfected with shCon, shARIH1#1 or shARIH1#2 for 36 h.

(b) Luciferase reporter assays analyzing ISRE promoter activity in HEK293 cells transfected with shCon, shARIH1#1 or shARIH1#2 together with the indicated plasmids for 36 h.

(c-e) qRT-PCR analysis of *IFNB*, *ISG56*, *CCL5*, *IP10* and *ARIH1* mRNA in THP-1 cells stably transfected with shCon or shARIH1#1 followed by infection with HSV-1 for 0-8 h (c), transfection with HSV60, DNA90 and HSV120 for 4 h (d) or transfection with cGAMP for 4 h (e).

(f) Immunoblot analysis of total and phosphorylated (p-) IRF3, TBK1 and P65, ARIH1 and GAPDH in THP-1 cells stably transfected with shCon or shARIH1#1 followed by infection with HSV-1 for 0-8 h or transfection with cGAMP for 0-4 h.

Data are representative of three (a, c-e) or two (b, f) independent experiments. Graphs show mean  $\pm$  S.D. (n = 3 for b, or n = 4 for c-e, biologically independent experiments). Statistical significance was determined using two-tailed Student's *t*-test in c-e, or one-way ANOVA in b. The quantitative analysis is derived from the same experiment and that blots were processed in parallel in f. Source data are provided as a Source Data file.

# Supplementary Figure 2

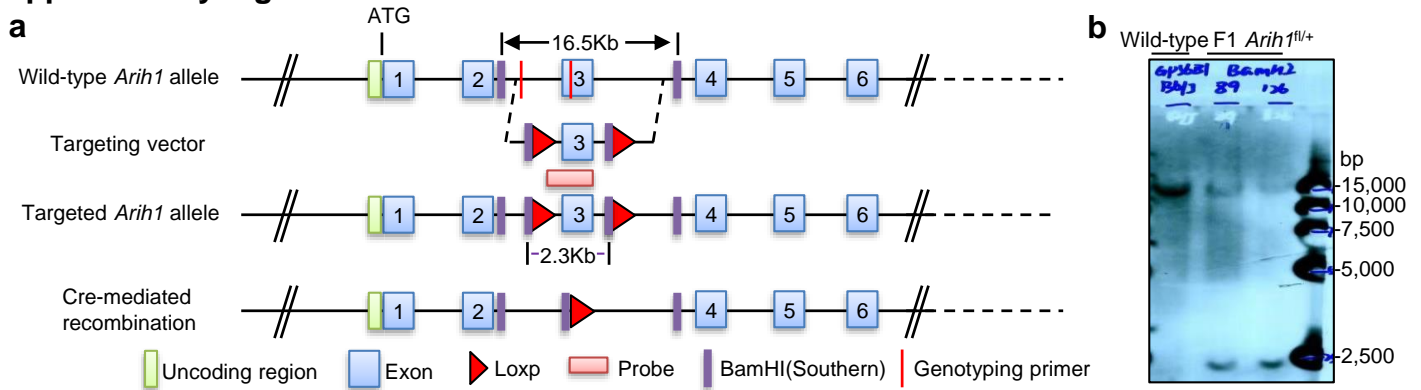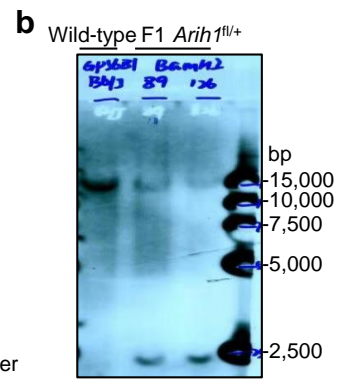

**c**

Reading frame

Wild-type mRNA 424 AAG CTA ATG GAA AGG.....GAC TGA 1668 bp  
 142 K L M E R ..... D \* 555 aa (full length)

Mutated mRNA 424 AAG CTA ATG GAA AGT..... ATT TAA 498 bp  
 142 K L M E S ..... I \* 165 aa (early termination)

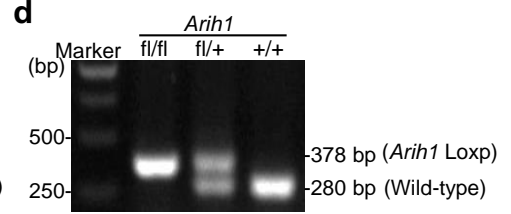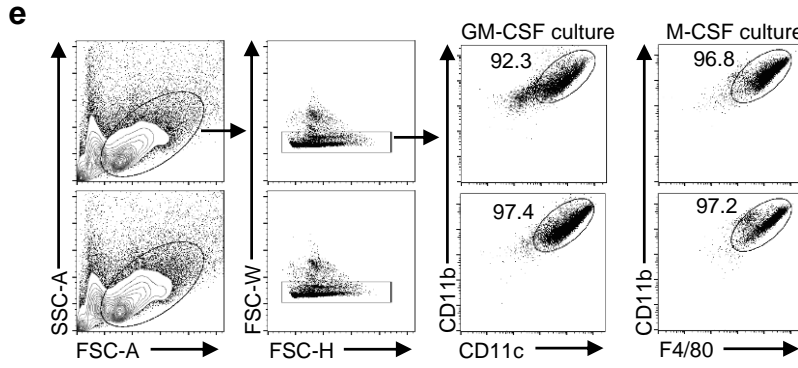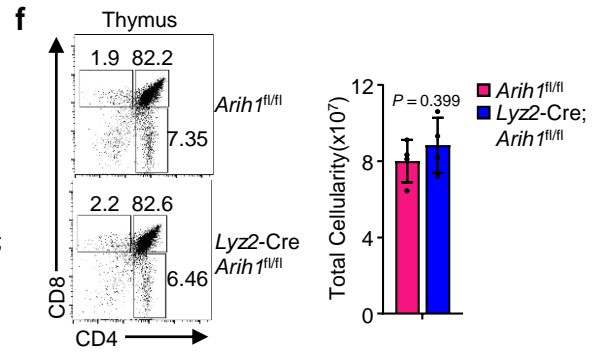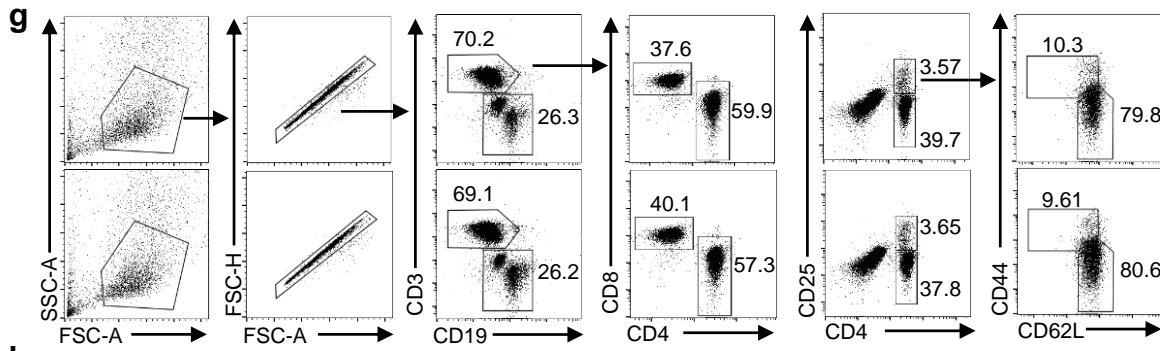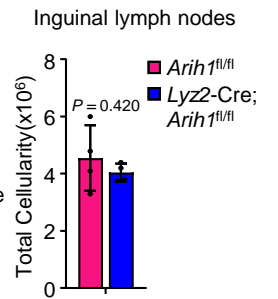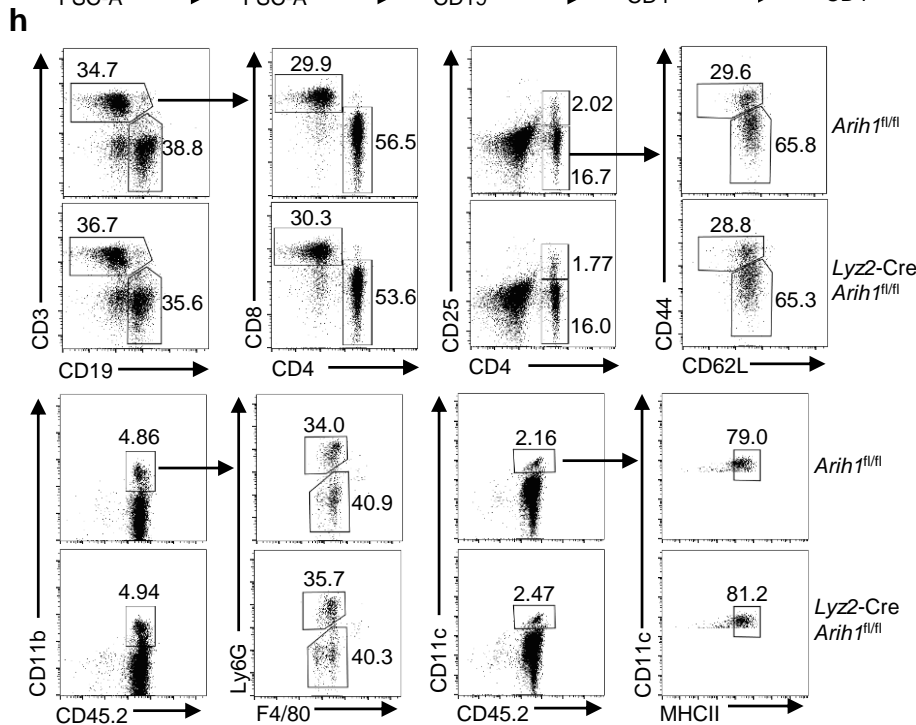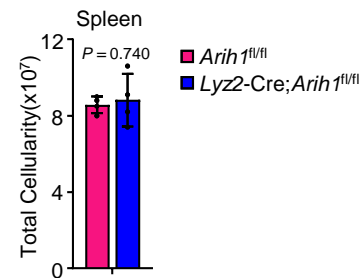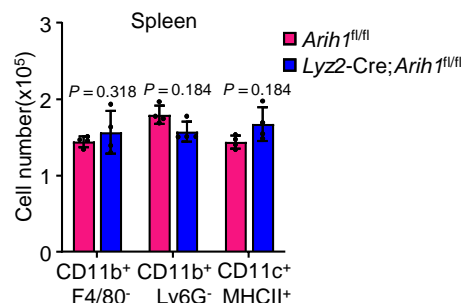

**Supplementary Figure 2 Generation of *Arih1*<sup>fl/+</sup> mice.**

(a) A scheme of CRIPSR/Cas9-mediated genome editing of the *Arih1* gene locus.

(b) Southern blot analysis of the generated F1 *Arih1*<sup>fl/+</sup> mice.

(c) mRNA sequence and reading frame of wild-type and edited *Arih1* alleles.

(d) Genotyping analysis of the tail DNAs from *Arih1*<sup>fl/fl</sup>, *Arih1*<sup>fl/+</sup> and unedited mice.

(e) Flow cytometry analysis of in vitro generated *Arih1*<sup>fl/fl</sup> and *Lyz2-Cre;Arih1*<sup>fl/fl</sup> BMDCs or BMDMs. The same Gating strategy was used in Fig. 2e and Supplementary Fig. 3f, 4e.

(f-h) Flow cytometry analysis of myeloid cells or lymphocytes and quantitative data in thymus (f), inguinal lymph nodes (g), and spleen (h) from *Arih1*<sup>fl/fl</sup> and *Lyz2-Cre;Arih1*<sup>fl/fl</sup> mice (n=4). Data are representative of two independent experiments (e-h). The same Gating strategy was used in Fig. 5e and Supplementary Fig. 2f, h.

Graphs show mean ± S.D. (n = 4 for f-h, biologically independent experiments). Statistical significance was determined using two-tailed Student's *t*-test in f-h. Source data are provided as a Source Data file.

# Supplementary Figure 3

**a**

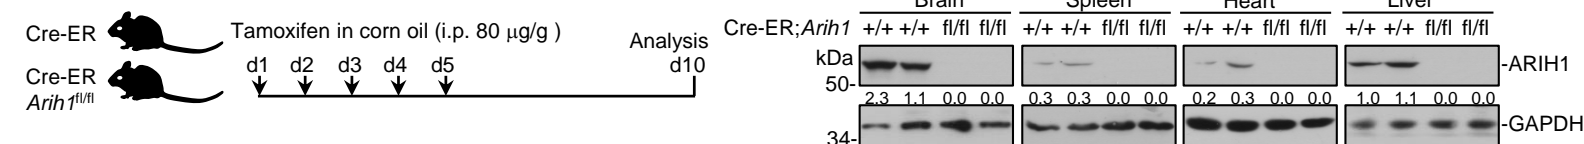

**b**

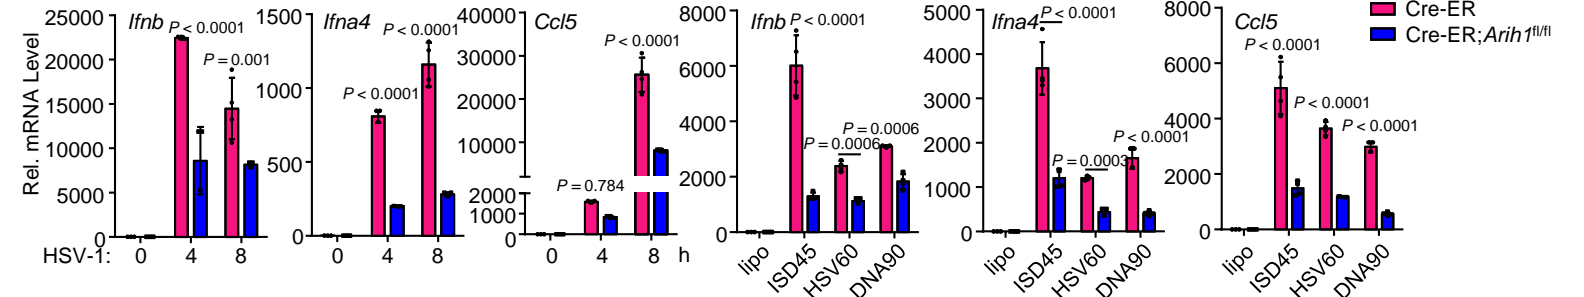

**c**

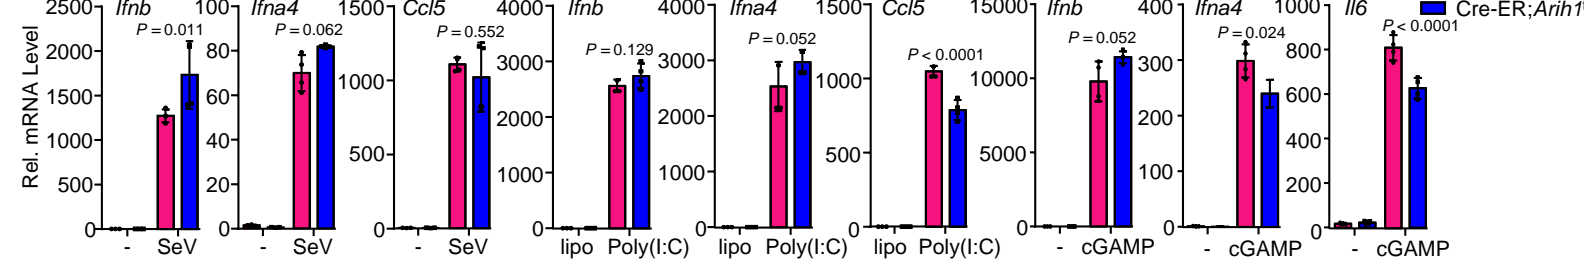

**d**

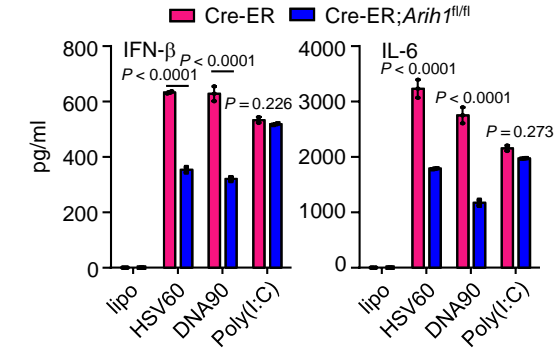

**e**

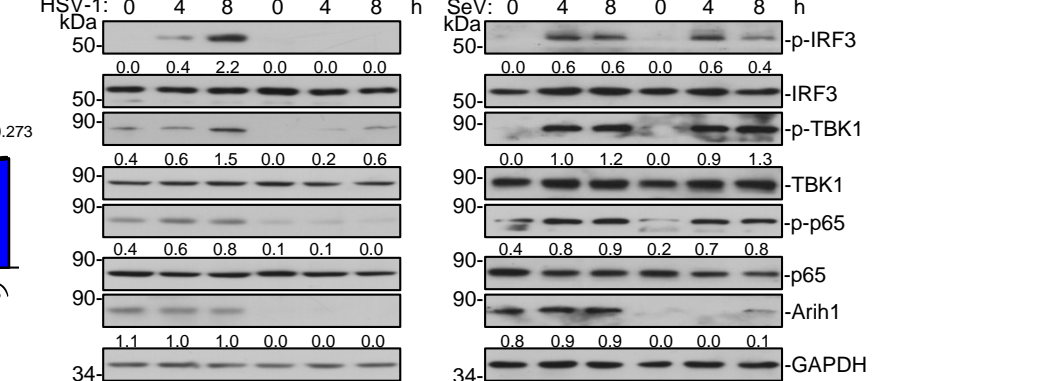

**f**

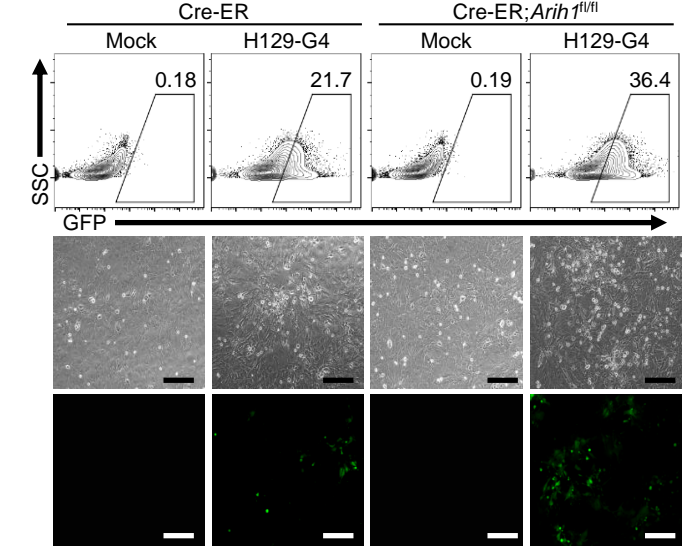

**g**

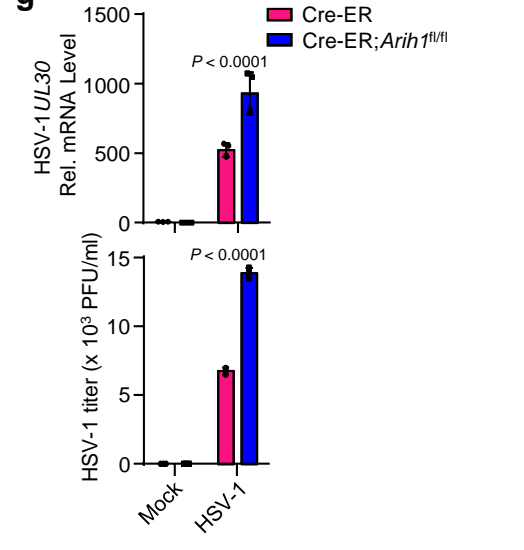

**Supplementary Figure 3 Knockout of ARIH1 inhibits cellular antiviral responses against HSV-1.**

- (a) Immunoblot analysis of ARIH1 and GAPDH in brains, spleens, hearts, and livers from Cre-ER and Cre-ER;*Arih1*<sup>fl/fl</sup> mice that were intraperitoneally injected with tamoxifen (80 mg/kg in corn oil) for 5 successive days and rested for another 5 days.
- (b) qRT-PCR analysis of *Ifnb*, *Ifna4* and *Ccl5* mRNA in Cre-ER and Cre-ER;*Arih1*<sup>fl/fl</sup> MLFs treated with 4-hydroxytamoxifen (4OHT, 1  $\mu$ M) for 3 days followed by infection with HSV-1 for 0-8 h.
- (c) qRT-PCR analysis of *Ifnb*, *Ifna4* and *Ccl5* mRNA in Cre-ER and Cre-ER;*Arih1*<sup>fl/fl</sup> MLFs treated as in (a) followed by infection with SeV for 0-8 h or transfection with poly(I:C) (1  $\mu$ g) or cGAMP (1  $\mu$ g) for 0-4 h.
- (d) ELISA analysis of IFN- $\beta$  and IL-6 in the supernatants of Cre-ER and Cre-ER;*Arih1*<sup>fl/fl</sup> MLFs treated as in (a) followed by transfection with HSV60, DNA90 and poly(I:C) (1  $\mu$ g) for 12 h.
- (e) Immunoblot analysis of total and phosphorylated (p-) IRF3, TBK1 and p65, Arih1 and GAPDH in Cre-ER and Cre-ER;*Arih1*<sup>fl/fl</sup> MLFs treated as in (b) followed by infection with HSV-1 (left panel) or SeV (right panel) for 0-8 h.
- (f) Flow cytometric analysis (upper flow charts) and fluorescent microscopy imaging (lower images) of the replication of H129-G4 (MOI = 0.5) in Cre-ER and Cre-ER;*Arih1*<sup>fl/fl</sup> MLFs treated as in (b) that were left uninfected or infected with H129-G4 for 1 h followed by twice PBS wash and culture in full medium for 12 h. Scale bars represent 200  $\mu$ m.
- (g) qRT-PCR analysis of HSV-1 *UL30* mRNA (upper graph) and plaque assays (lower graph) analyzing HSV-1 titers in Cre-ER and Cre-ER;*Arih1*<sup>fl/fl</sup> MLFs treated as in (b) that were infected with HSV-1 (MOI = 0.5) for 1 h followed by twice PBS wash and culture in full medium for 12 h.
- Data are representative of three (b, c) or two (d-g) independent experiments. Graphs show mean  $\pm$  S.D. (n = 4 for b-c, g, or n = 3 for d, biologically independent experiments). Statistical significance was determined using two-tailed Student's *t*-test in b-d, g. The quantitative analysis is derived from the same experiment and that blots were processed in parallel in e. Source data are provided as a Source Data file.

# Supplementary Figure 4

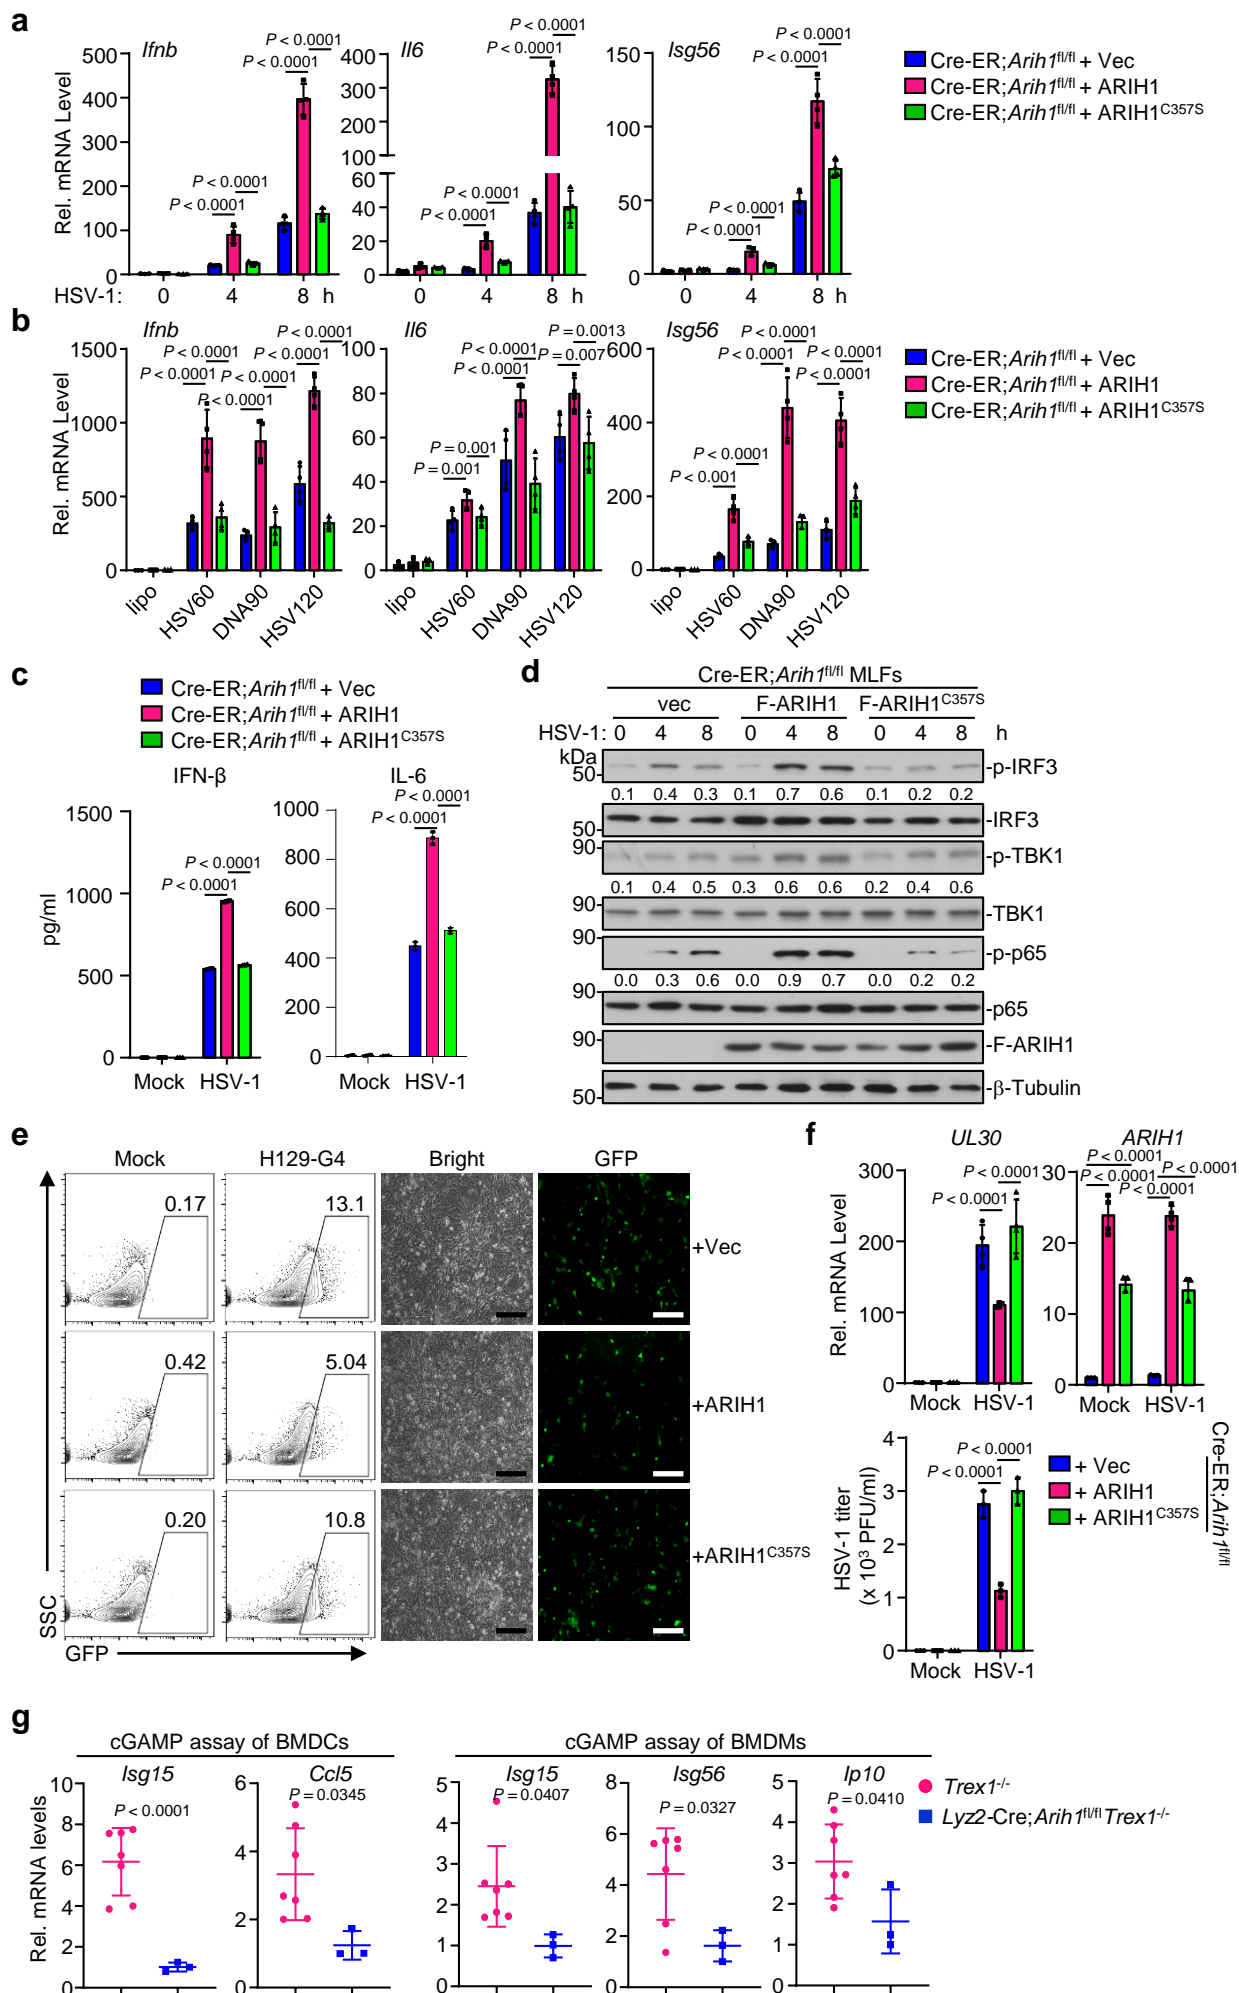

**Supplementary Figure 4 The enzyme activity of ARIH1 is required for antiviral signaling.**

(a-c) qRT-PCR analysis of *Ifnb*, *Ilf6* and *Isg56* mRNA (a, b) or ELISA analysis of IFN- $\beta$  and IL-6 (c) in Cre-ER;*Arih1*<sup>fl/fl</sup> MLFs treated with 4-hydroxytamoxifen (4OH Tam, 1  $\mu$ M) and reconstituted with empty vector (Vec), FLAG-ARIH1 or ARIH1<sup>C357S</sup> followed by infection with HSV-1 for 0-8 h (a) or 12 h (c) or transfection with HSV60, DNA90 or HSV120 (1  $\mu$ g) for 8 h (b).

(d) Immunoblot analysis of total and phosphorylated (p-) IRF3, TBK1 and p65, FLAG-ARIH1 and  $\beta$ -tubulin in Cre-ER and Cre-ER;*Arih1*<sup>fl/fl</sup> MLFs treated as in (a) followed by infection with HSV-1 for 0-8 h.

(e) Flow cytometric analysis (left flow charts) and fluorescent microscopy imaging (right images) of the replication of H129-G4 (MOI = 0.5) in Cre-ER and Cre-ER;*Arih1*<sup>fl/fl</sup> MLFs treated as in (a) that were infected with H129-G4 for 1 h followed by twice PBS wash and culture in full medium for 12 h. Scale bars represent 200  $\mu$ m.

(f) qRT-PCR analysis of HSV-1 *UL30* and *ARIH1* mRNA (upper graphs) and plaque assays (bottom graph) analyzing HSV-1 titers in Cre-ER and Cre-ER;*Arih1*<sup>fl/fl</sup> MLFs treated as in (a) that were infected with HSV-1 (MOI = 0.5) for 1 h followed by twice PBS wash and culture in full medium for 12 h.

(g) qRT-PCR analysis of *Isg15*, *Isg56* and *Ip10* in L929 cells to analyze the cGAMP activity in the homogenates of *Trex1*<sup>-/-</sup> and *Lyz2*-Cre;*Arih1*<sup>fl/fl</sup>*Trex1*<sup>-/-</sup> BMDMs (left graphs) and BMDMs (right graphs) that were transfected with DNA120 (1  $\mu$ g) for 6 h.

Data are representative of two independent experiments (a-g). Graphs show mean  $\pm$  S.D. (n = 4 for a-b, f or n = 3 for c, or n = 7 and 3 for g, biologically independent experiments).

Statistical significance was determined using two-tailed Student's *t*-test in g, or one-way ANOVA in a-c, f. The quantitative analysis is derived from the same experiment and that blots were processed in parallel in d. Source data are provided as a Source Data file.



# Supplementary Figure 5

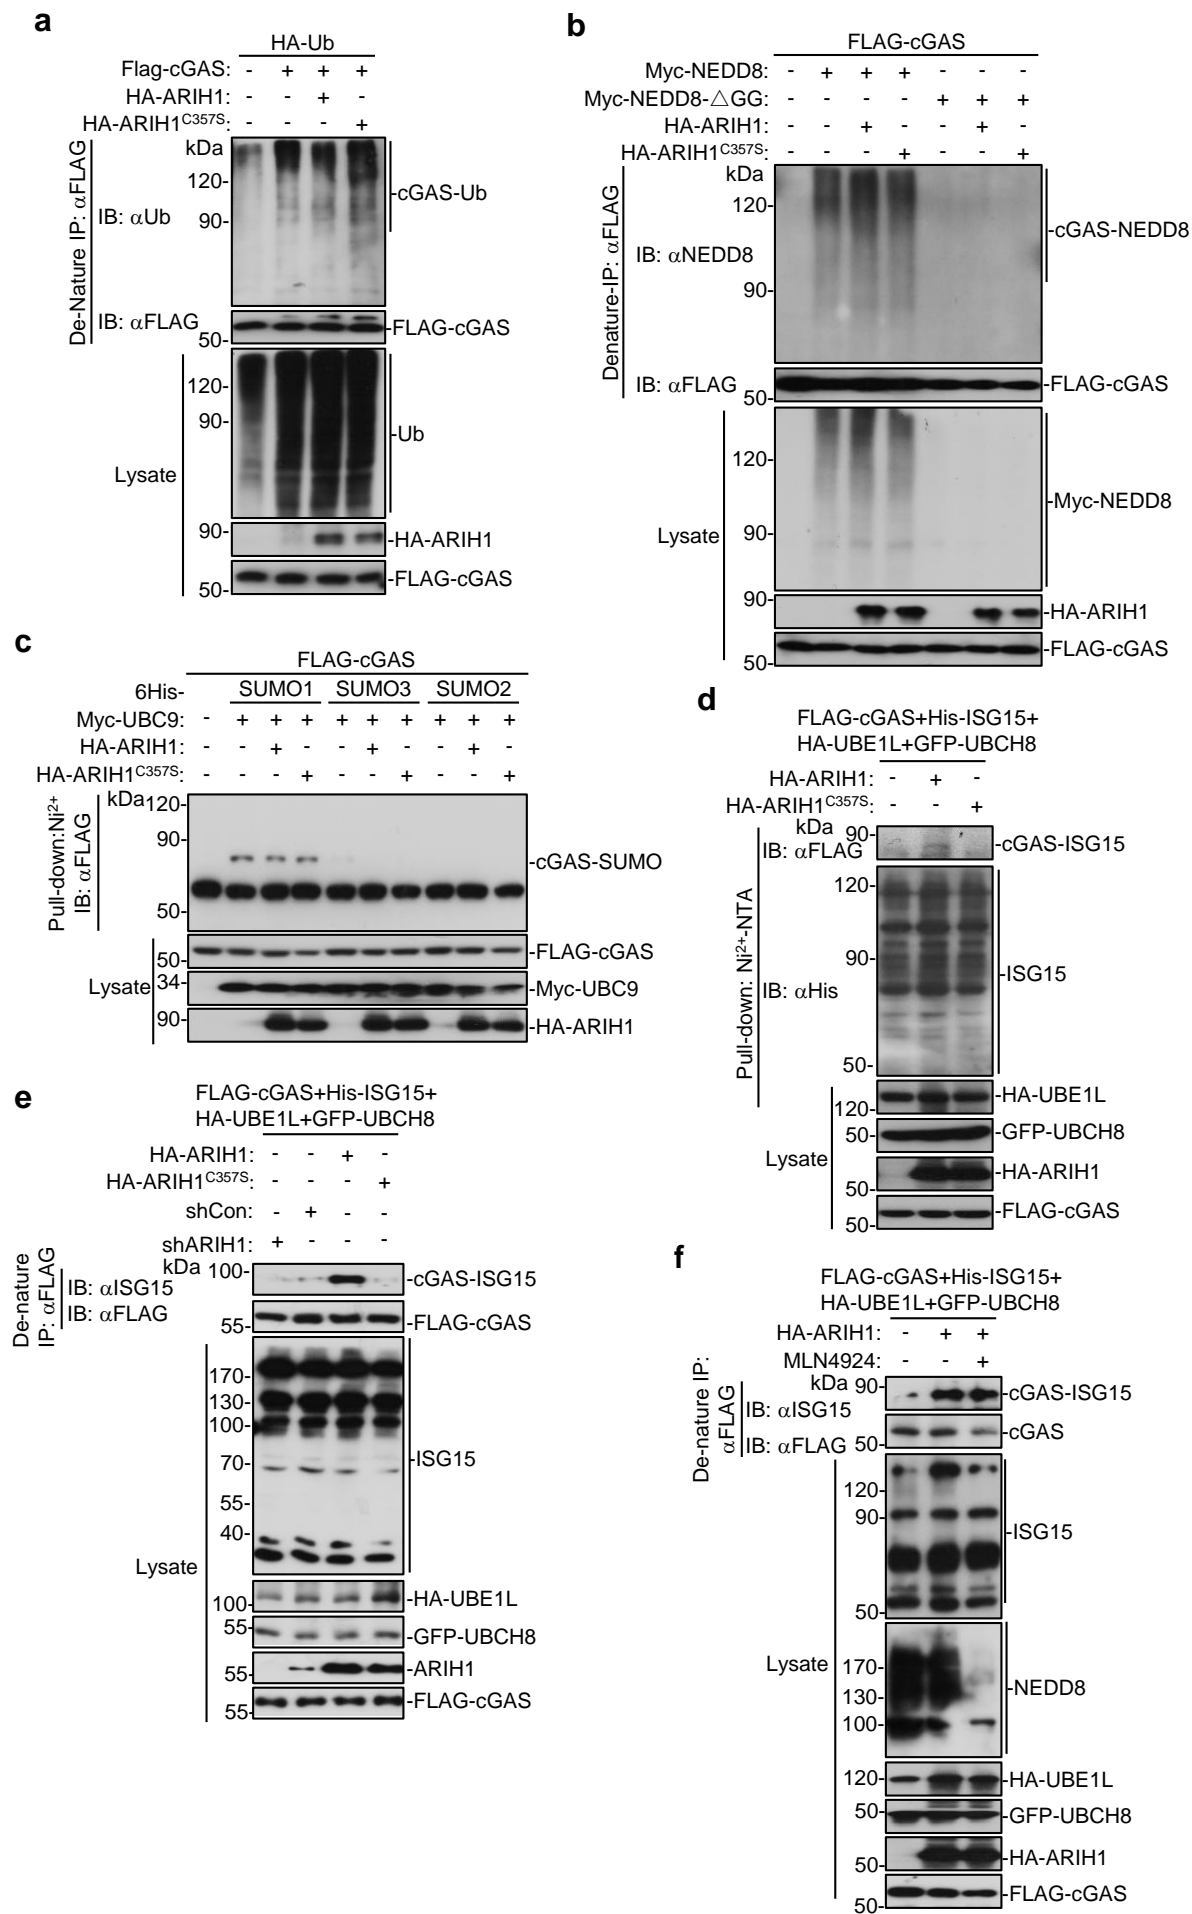

**Supplementary Figure 5 ARIH1 catalyzes mono-ISGylation but not other ubiquitin-like modifications of cGAS.**

- (a) Denature-IP (with anti-FLAG) and immunoblot analysis (with anti-FLAG, anti-HA or anti-Ub) of HEK293 cells transfected with plasmids encoding an empty vector, HA-ARIH1 or ARIH1<sup>C357S</sup> together with FLAG-cGAS and HA-Ub for 24 h.
- (b) Denature-IP (with anti-FLAG) and immunoblot analysis (with anti-FLAG, anti-HA, or anti-NEDD8) of HEK293 cells transfected with plasmids encoding an empty vector, HA-ARIH1 or ARIH1<sup>C357S</sup> together with FLAG-cGAS and Myc-NEDD8 or Myc-NEDD8 $\Delta$ GG for 24 h.
- (c) Ni<sup>2+</sup>-NTA pull-down and immunoblot analysis (with anti-FLAG, anti-HA, or anti-Myc) of HEK293 cells transfected with plasmids encoding an empty vector, HA-ARIH1 or ARIH1<sup>C357S</sup> together with FLAG-cGAS, Myc-UBC9 and His-SUMO1, His-SUMO2 or His-SUMO3 for 24 h.
- (d) Ni<sup>2+</sup>-NTA pull-down and immunoblot analysis (with anti-FLAG, anti-HA, anti-GFP, or anti-His) of HEK293 cells transfected with plasmids encoding an empty vector, HA-ARIH1 or ARIH1<sup>C357S</sup> together with FLAG-cGAS, His-ISG15, GFP-UBCH8 and HA-UBE1L for 24 h.
- (e) Denature-IP (with anti-FLAG) and immunoblot analysis (with anti-FLAG, anti-HA, anti-GFP or anti-ISG15) of HEK293 cells transfected with plasmids encoding an empty vector, HA-ARIH1, ARIH1<sup>C357S</sup>, shCon, or shARIH1#2 together with FLAG-cGAS, His-ISG15, GFP-UBCH8 and HA-UBE1L for 24 h.
- (f) Denature-IP (with anti-FLAG) and immunoblot analysis (with anti-FLAG, anti-HA, anti-GFP or anti-ISG15) of HEK293 cells transfected with plasmids encoding an empty vector, HA-ARIH1 or ARIH1<sup>C357S</sup> together with FLAG-cGAS, His-ISG15, GFP-UBCH8 and HA-UBE1L for 8 h followed by treatment with MLN4924 for 24 h.
- Data are representative of three independent experiments (a-f). Source data are provided as a Source Data file.

# Supplementary Figure 6

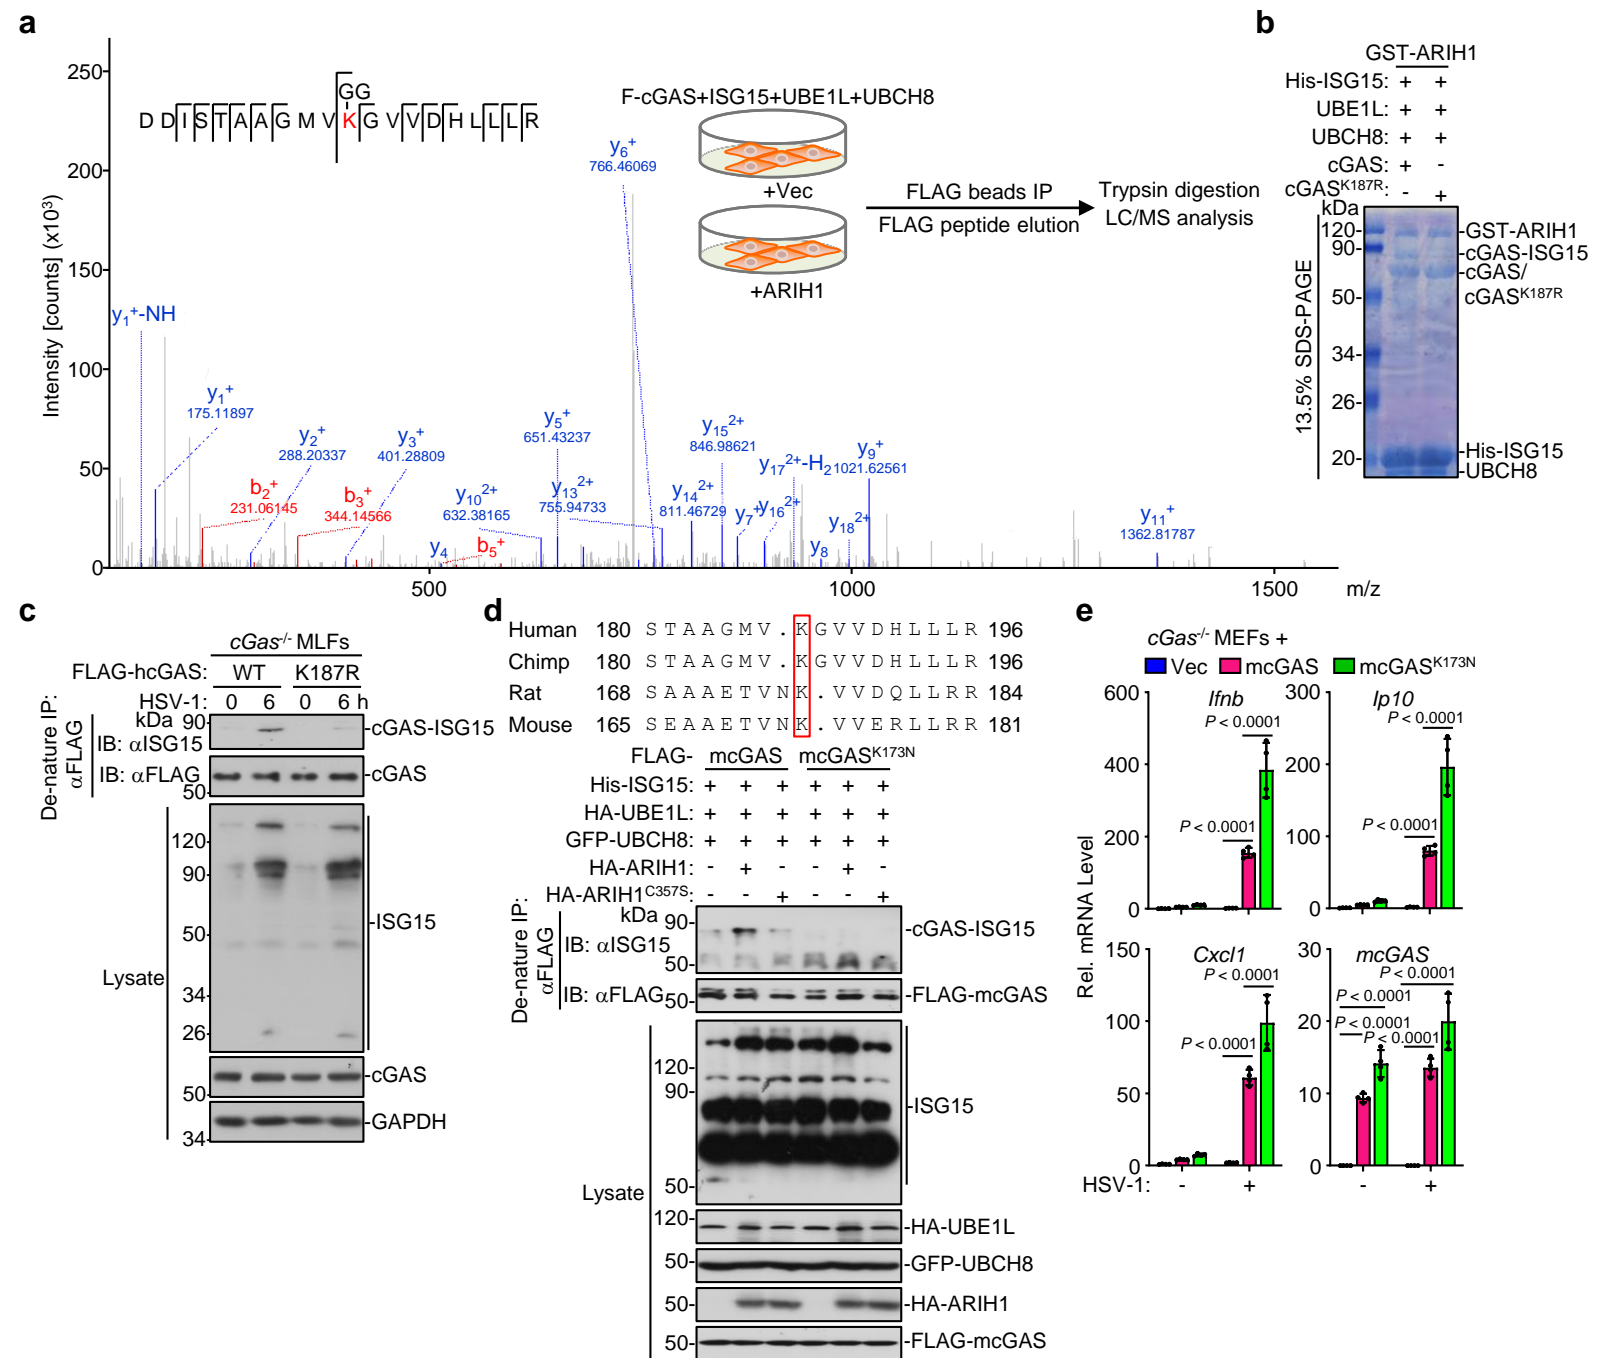

## Supplementary Figure 6 ARIH1 catalyzes mono-ISGylation of cGAS.

(a) Strategy of identifying the ISGylated sites of cGAS. FLAG-cGAS was purified from HEK293 cells transfected with FLAG-cGAS, His-ISG15, HA-UBE1L and GFP-UBCH8 together with an empty control vector or HA-ARIH1 and followed by immunoprecipitation (with anti-FLAG agarose) and elution (with 3 × FLAG peptide). The eluted proteins were digested by trypsin and subsequently analyzed by LC/MS.

(b) In vitro ISGylation assay of cGAS or cGAS<sup>K187R</sup>. Purified cGAS or cGAS<sup>K187R</sup> (5 μg) were incubated with GST-ARIH1 (5 μg), UBE1L (0.2 μg), UBCH8 (0.5 μg) and His-ISG15 (5 μg) in the presence of ATP (5 mM) at 37°C for 2 h and subject to 13.5% SDS-PAGE followed by Coomassie brilliant blue staining.

(c) Denature-IP (with anti-FLAG) and immunoblot analysis (with anti-FLAG, anti-GAPDH or anti-ISG15) of cGas<sup>-/-</sup> MLFs reconstituted with FLAG-cGAS or cGAS<sup>K187R</sup> followed by HSV-1 infection for 0-6 h.

(d) An alignment of cGAS of different species (upper image). Denature-IP (with anti-FLAG) and immunoblot analysis (with anti-FLAG, anti-HA, anti-GFP or anti-ISG15) of HEK293 cells transfected with plasmids encoding an empty vector, HA-ARIH1 or ARIH1<sup>C357S</sup> together with His-ISG15, GFP-UBCH8 HA-UBE1L and FLAG-mcGAS or FLAG-mcGAS<sup>K173N</sup> for 24 h (lower blots).

(e) qPCR analysis of *Ifnb*, *Ip10*, *Cxcl1*, and *mcGAS* mRNA in cGas<sup>-/-</sup> MEFs reconstituted with an empty vector (Vec), mcGAS or mcGAS<sup>K173N</sup> followed by HSV-1 infection for 0-8 h. Data are representative of three independent experiments (b-e). Graphs show mean ± S.D. (n = 4 for e, biologically independent experiments). Statistical significance was determined using one-way ANOVA in e. Source data are provided as a Source Data file.

# Supplementary Figure 7

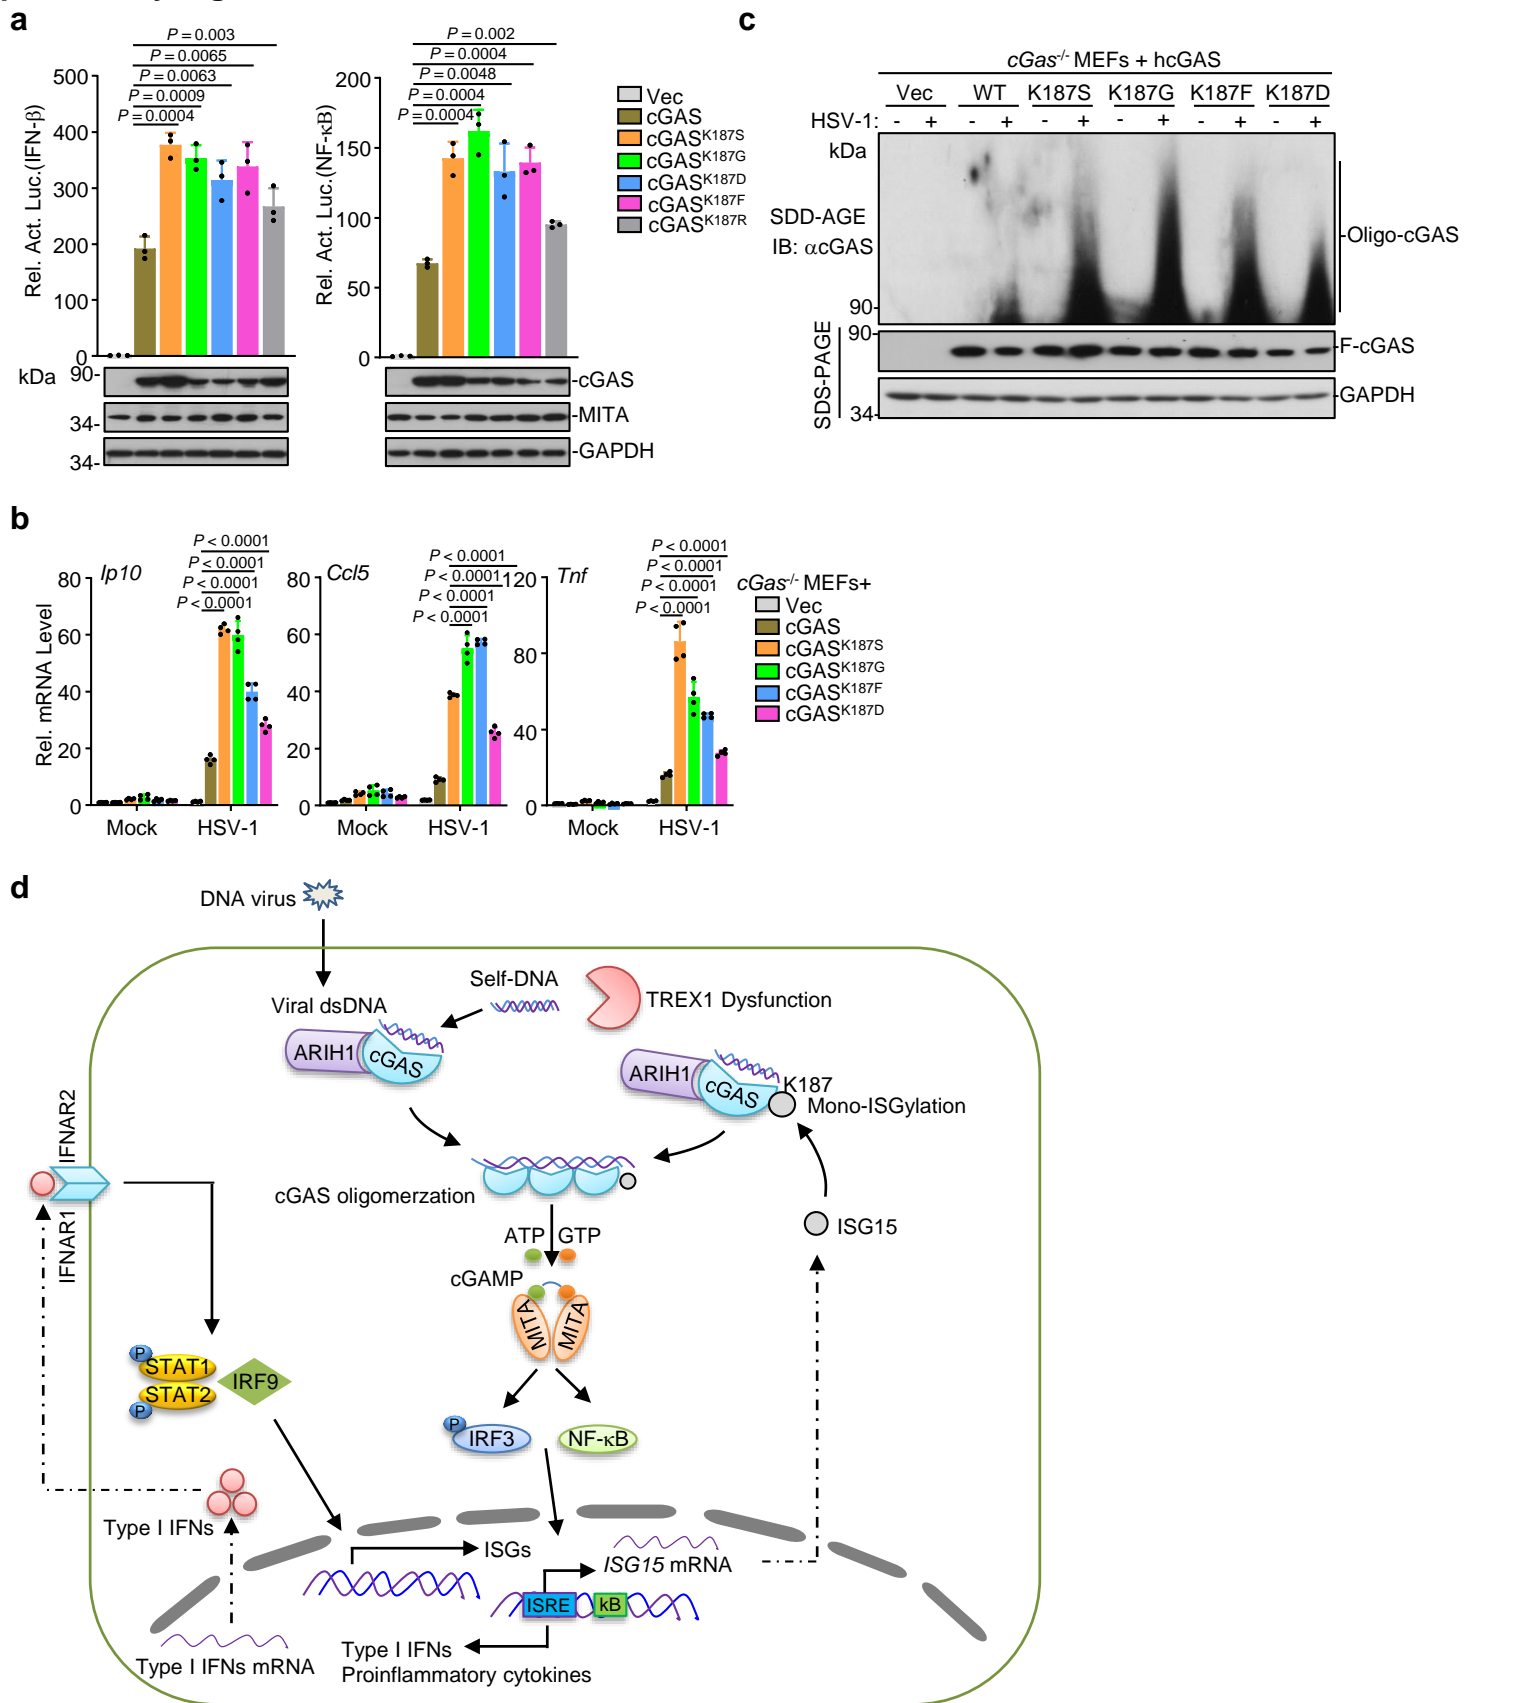

## Supplementary Figure 7 Lys 187 of cGAS inhibits its activation and oligomerization.

(a) Luciferase reporter assays analyzing IFN- $\beta$  and NF- $\kappa$ B promoter activity in HEK293 cells transfected with an empty vector (Vec), cGAS, cGAS<sup>K187S</sup>, cGAS<sup>K187G</sup>, cGAS<sup>K187D</sup>, cGAS<sup>K187F</sup>, or cGAS<sup>K187R</sup> together with FLAG-MITA for 24 hours.

(b) qRT-PCR analysis of *Ip10*, *Ccl5*, and *Tnf* in *cGas*<sup>-/-</sup> MEFs reconstituted with vec, cGAS, cGAS<sup>K187S</sup>, cGAS<sup>K187G</sup>, cGAS<sup>K187D</sup>, or cGAS<sup>K187F</sup> followed by treatment with HSV-1 for 8 h.

(c) Immunoblot assays with SDD-AGE to analyze the aggregation of cGAS and with SDS-PAGE to analyze the expression levels of the indicated proteins in cells treated as in (b).

(d) A model on ARIH1-mediated mono-ISGylation of cGAS and regulation of cGAS-dependent antiviral immunity and autoimmunity.

Data are representative of three independent experiments (a-c). Graphs show mean  $\pm$  S.D. (n = 3 for a, or n = 4 for b, biologically independent experiments). Statistical significance was determined using one-way ANOVA in a,e. Source data are provided as a Source Data file.

Supplementary Table 1. antibody information

| Antibody                                     | Source & Identifier                       | Dilution |
|----------------------------------------------|-------------------------------------------|----------|
| mouse control IgG                            | Santa Cruz Biotechnology, sc-2025         | 1/1000   |
| rabbit control IgG                           | Millipore, 12-370                         | 1/1000   |
| HRP-conjugated goat-anti mouse or rabbit IgG | Thermo Scientific, PA1-86717 and SA1-9510 | 1/1000   |
| mouse anti-FLAG                              | Sungene, KM8002                           | 1/5000   |
| anti-GFP                                     | Sungene, KM8009                           | 1/5000   |
| anti- $\beta$ -Actin                         | Sungene, KM9001                           | 1/10000  |
| anti-GAPDH                                   | Sungene, KM9002                           | 1/10000  |
| anti-Tubulin                                 | Sungene, KM9003                           | 1/10000  |
| anti-Myc                                     | Sungene, KM8003                           | 1/10000  |
| anti-HA                                      | Covance, MMS-101R                         | 1/10000  |
| anti-Ubiquitin                               | Santa Cruz Biotechnology, sc-8017         | 1/1000   |
| anti-TBK1                                    | Abcam, 96328-11                           | 1/5000   |
| anti-p-TBK1                                  | Abcam, 109272                             | 1/1000   |
| anti-IRF3                                    | Santa Cruz Biotechnology, sc-33641        | 1/5000   |
| anti-p-IRF3                                  | Cell Singling Technologies, 4947S         | 1/1000   |
| anti-p65                                     | Santa Cruz Biotechnology, sc-8008         | 1/2000   |
| anti-p-p65                                   | Cell Singling Technologies, 3033S         | 1/1000   |
| anti-hcGAS                                   | Cell Singling Technologies, 83623         | 1/1000   |
| anti-mcGAS                                   | Cell Singling Technologies, 31659         | 1/1000   |
| anti-ARIH1                                   | Abcam, ab3891                             | 1/1000   |
| anti-ISG15                                   | Abclonal, A2416                           | 1/1000   |
| anti-NEDD8                                   | Abclonal, A1163                           | 1/1000   |
| anti-CD3                                     | Biolegend, 100312                         | 1/300    |
| anti-CD19                                    | Biolegend, 152404                         | 1/300    |
| anti-GL7                                     | Biolegend, 144610                         | 1/300    |
| anti-FAS                                     | Biolegend, 152608                         | 1/300    |
| anti-CD4                                     | Biolegend, 558107                         | 1/300    |
| anti-CD8                                     | Biolegend, 100734                         | 1/300    |
| anti-CD44                                    | Biolegend, 103012                         | 1/300    |
| anti-CD62L                                   | Sungene, M10621-02E                       | 1/300    |
| anti-CD25                                    | Sungene, M10251-09B                       | 1/300    |
| anti-CD11b                                   | Sungene, M10117-02E                       | 1/300    |
| anti-CD45.2                                  | Biolegend, 109806                         | 1/300    |
| anti-F4/80                                   | Biolegend, 123110                         | 1/300    |
| anti-Ly6G                                    | biolegend, 127624                         | 1/300    |
| anti-CD11c                                   | Biolegend, 117328                         | 1/300    |
| anti-MHCII                                   | Sungene, M100M2-11C                       | 1/300    |
| anti-CD16/32                                 | Sungene, M10161-02B                       | 1/300    |

Supplementary Table 2. sequences of DNA ligands

| DNA ligands | Forward                                                                                                                            | Reverse                                                                                                                           |
|-------------|------------------------------------------------------------------------------------------------------------------------------------|-----------------------------------------------------------------------------------------------------------------------------------|
| ISD45       | TACAGATCTACTAGTGATCTATGACTGAT<br>CTGTACATGATCTACA                                                                                  | TGTAGATCATGTACAGATCAGTCATAGAT<br>CACTAGTAGATCTGTA                                                                                 |
| HSV60       | TAAGACACGATGCGATAAAATCTGTTTGT<br>AAAATTTATTAAGGGTACAAATTGCCCTAGC                                                                   | GCTAGGGCAATTTGTACCCTTAATAAATT<br>TTACAAACAGATTTTATCGCATCGTGTCTTA                                                                  |
| DNA90       | TACAGATCTACTAGTGATCTATGACTGATC<br>TGTACATGATCTACATACAGATCTACTAGT<br>GATCTATGACTGATCTGTACATGATCTACA                                 | TGTAGATCATGTACAGATCAGTCATAGATC<br>ACTAGTAGATCTGTATGTAGATCATGTACA<br>GATCAGTCATAGATCACTAGTAGATCTGTA                                |
| HSV120      | AGACGGTATATTTTTGCGTTATCACTGTCCC<br>GGATTGGACACGGTCTTGTGGGATAGGCAT<br>GCCAGAAGGCATATTGGGTAAACCCCTTT<br>TTATTGTGGCGGGTTTTTTGGAGGACTT | AAGTCCTCCAAAAAACCCGCCACAAATAAA<br>AAGGGGTAAACCAATATGCCTTCTGGGCAT<br>GCCTATCCACAAGACCGTGTCCAATCCGGG<br>ACAGTGATAACGAAAAATATACCGTCT |

Supplementary Table 3. sequences of qPCR primers

| Gene            | Forward                 | Reverse                 |
|-----------------|-------------------------|-------------------------|
| <i>β-Actin</i>  | CACCATTGGCAATGAGCGGTTTC | AGGTCTTTGCGGATGTCCACGT  |
| <i>cGAS</i>     | AGAAGGCCTGCGCATTCAA     | GCCGCCATGTTTCTTCTTGGA   |
| <i>CXCL1</i>    | AGCTTGCCCTCAATCCTGCATCC | TCCTTCAGGAACAGCCACCAGT  |
| <i>IFN-β</i>    | TTGTTGAGAACCTCCTGGCT    | TGACTATGGTCCAGGCACAG    |
| <i>IL6</i>      | AGACAGCCACTCACCTCTTCAG  | TTCTGCCAGTGCCTCTTTGCTG  |
| <i>IP10</i>     | GGTGAGAAGAGATGTCTGAATCC | GTCCATCCTTGAAGCACTGCA   |
| <i>ISG15</i>    | AGGACAGGGTCCCCCTTGCC    | CCTCCAGCCCGCTCACTTGC    |
| <i>ISG56</i>    | TCATCAGGTCAAGGATAGTC    | CCACACTGTATTTGGTGTCTAGG |
| <i>ARIH1</i>    | ACTTTGATGGAAACCTGGAGAA  | GCCAGTGAAATACGAGTTAGGG  |
| <i>CCL5</i>     | GGCAGCCCTCGCTGTCATCC    | GCAGCAGGGTGTGGTGTCCG    |
| <i>TNF</i>      | GCCGCATCGCCGTCTCTAC     | CCTCAGCCCCCTCTGGGGTC    |
| <i>UL30</i>     | CATCACCGACCCGGAGAGGGAC  | GGGCCAGGCGCTTGTGGTGTA   |
| <i>mIsg56</i>   | GAAGTCCTTTGCTTGGAGGA    | AGCCAAGAAGGCTGGTACT     |
| <i>mIfnb</i>    | TACAACAGATACGCCTGGAT    | AGTCCGCCTCTGATGCTTAA    |
| <i>mIlf6</i>    | ACAAAGCCAGAGTCTTCAGA    | TCCTTAGCCACTCCTTCTGT    |
| <i>mCcl5</i>    | ATATGGCTCGGACACCACTC    | CCACTTCTTCTCTGGGTTGG    |
| <i>mcGAS</i>    | TGTCAGTGTGGAGAAGGAAAAA  | CAGCCAGCCTTGAATAGGTAG   |
| <i>mArih1</i>   | GGTGAAACAGAAGATGGAGGAG  | TTTGAGGTAGAAAGCGAAGACA  |
| <i>mIfna4</i>   | AGGATCACTGTGTACCTGAGA   | TCTCCACACTTGTCTCAGGA    |
| <i>mIp10</i>    | GTGAGAATGAGGGCCATAGG    | TTTTTGGCTAAACGCTTTCAT   |
| <i>mIsg15</i>   | GGCCACAGCAACATCTATGA    | ACTGGGGCTTTAGCCATAC     |
| <i>mCxcl1</i>   | CACTCAAGAATGGTCGCGAG    | GTTGTGAGAAGCCAGCGTTC    |
| <i>mβ-actin</i> | ACGGCCAGGTCATCACTATT    | TGGCATAGAGGTCTTTACGGA   |
